# Supplementary material for: Cilia interactome with predicted protein–protein interactions reveals connections to Alzheimer’s disease, aging and other neuropsychiatric processes
Source: PubMed Central journal article supplement (PMC7515907; doi:10.1038/s41598-020-72024-4), 2020-09-24

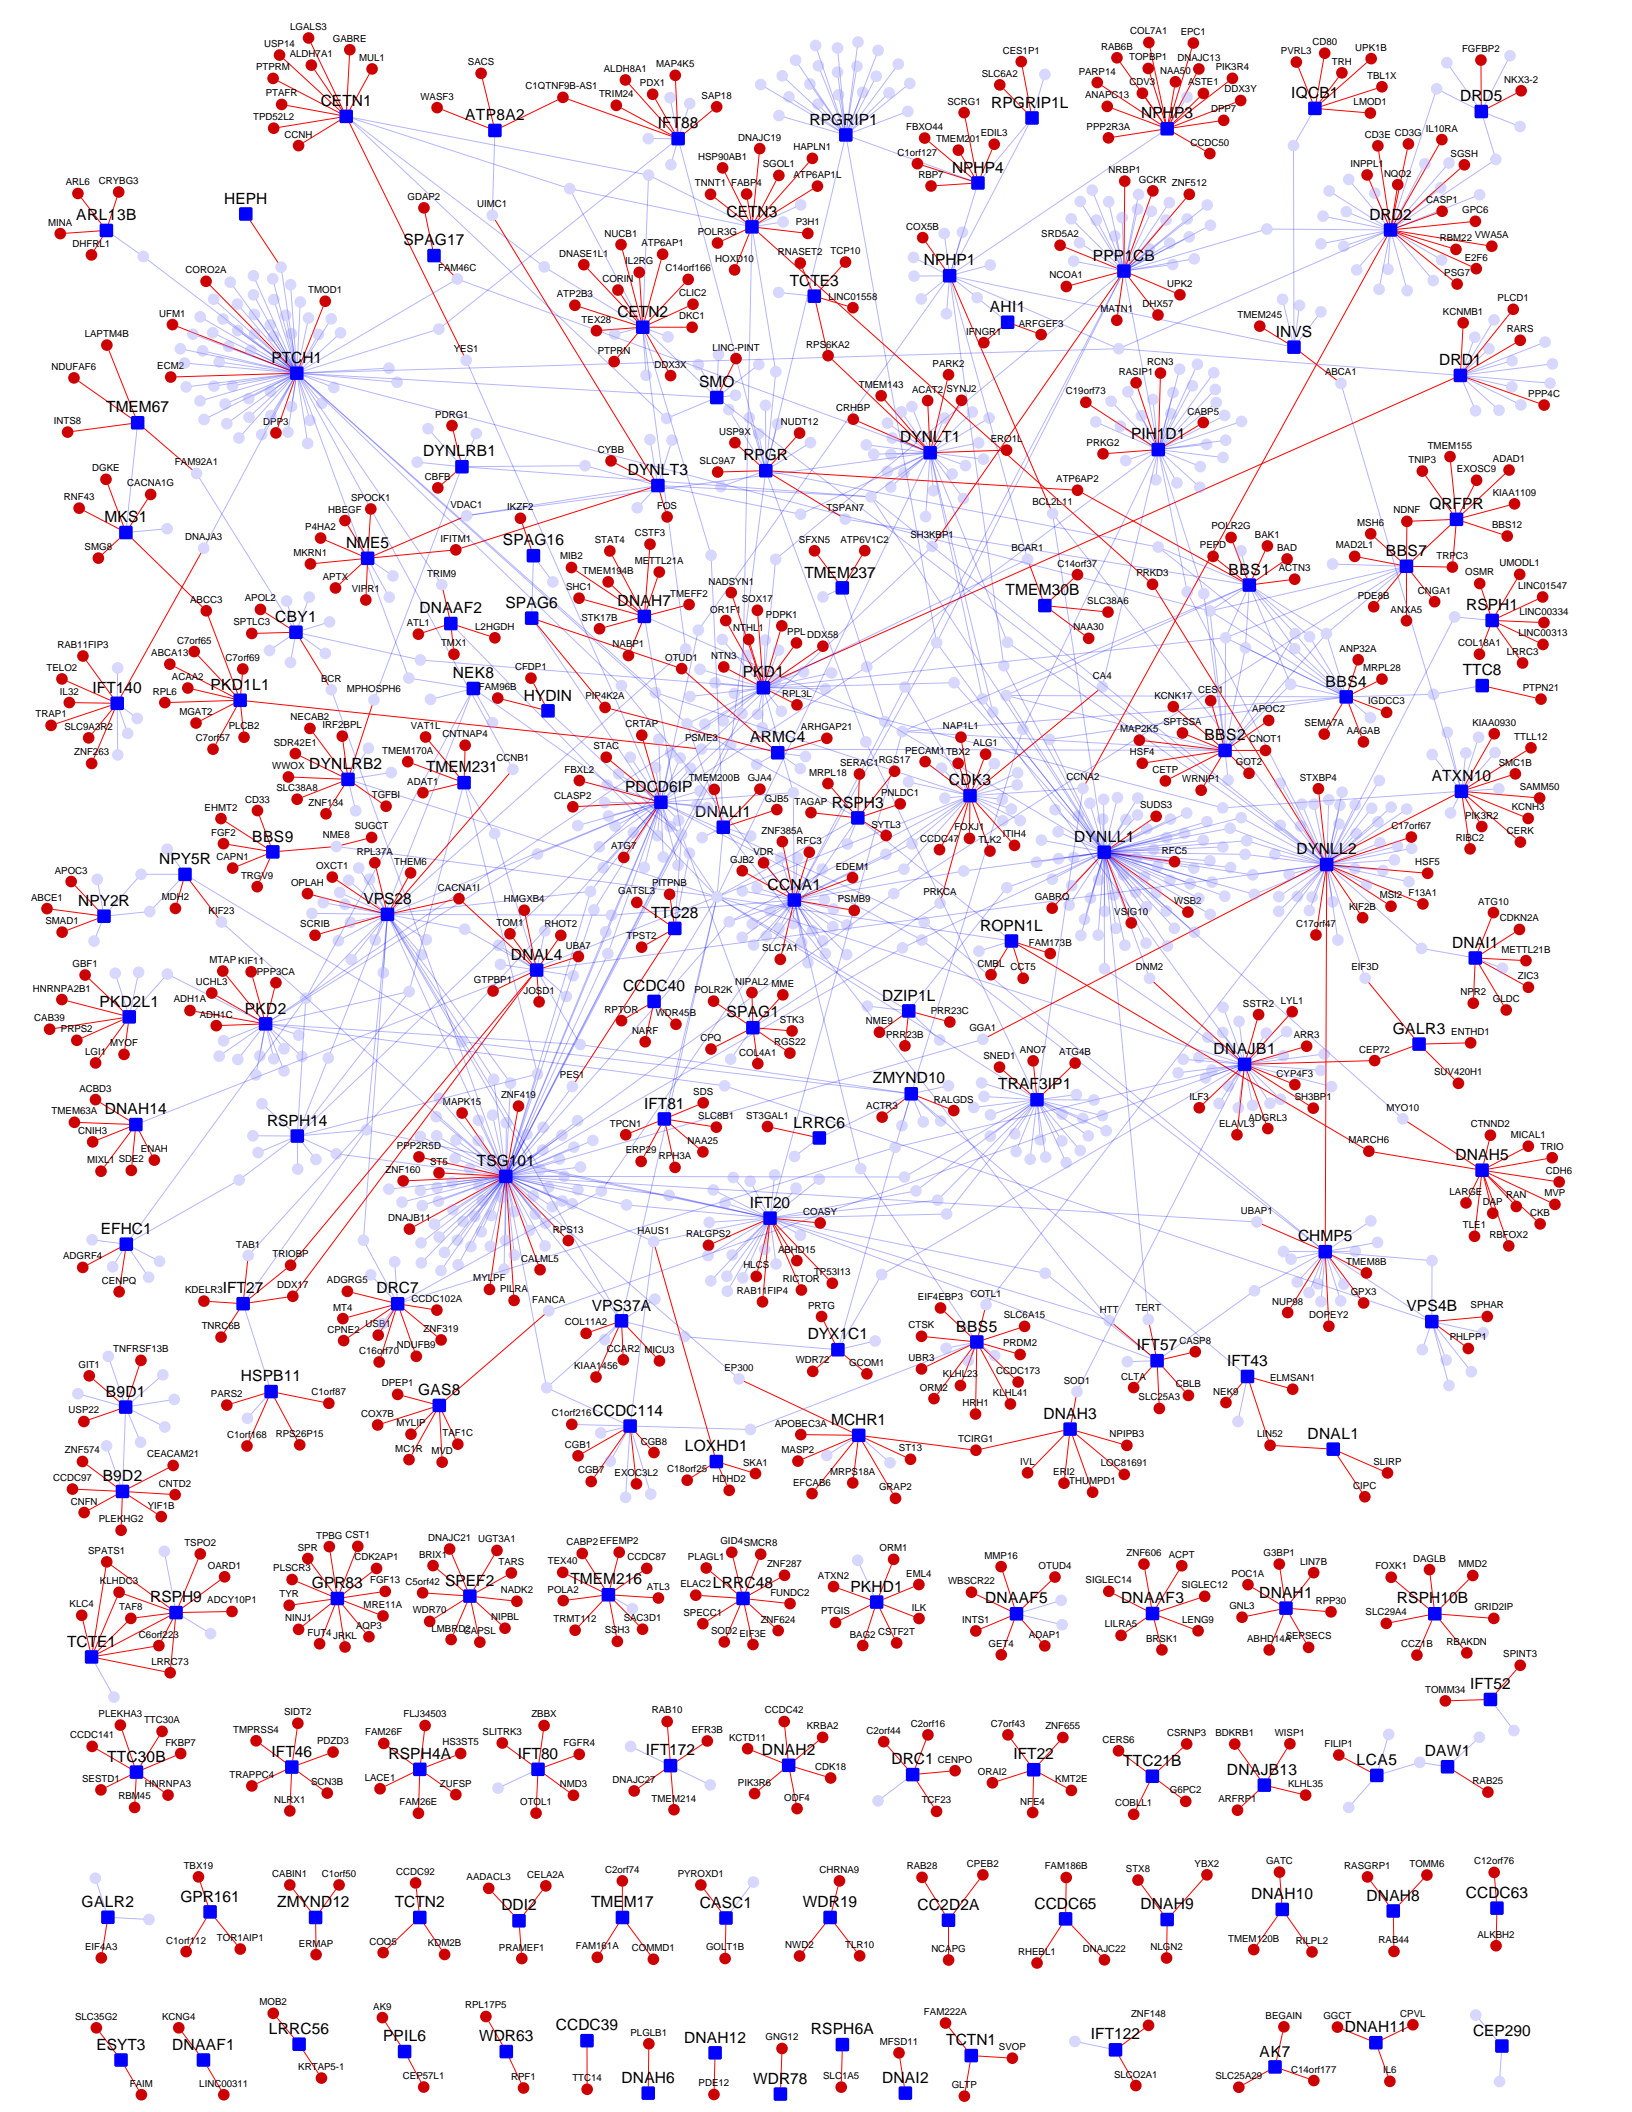

Supplement: 41598_2020_72024_MOESM6_ESM.pdf [file 41598_2020_72024_MOESM6_ESM.pdf]
